# Supplementary material for: Oxysterols Profile in Zebrafish Embryos Exposed to Triclocarban and Propylparaben—A Preliminary Study
Source: MDPI journal article supplement (doi:10.3390/ijerph19031264), 2022-01-24
Supplement: s1 [file s1]

**Table S1.** Total oxysterols mean values  $\pm$  SD at 8 and 24 hpf reported after the PP and TCC treatment.

|                  | Mean $\pm$ SD at 8 hpf | Mean $\pm$ SD at 24 hpf |
|------------------|------------------------|-------------------------|
| DMSO 0.1%        | 41.32 $\pm$ 7.08       | 64.09 $\pm$ 6.82        |
| PP 10 $\mu$ g/L  | 43.08 $\pm$ 26.98      | 73.11 $\pm$ 26.76       |
| PP 1 mg/L        | 22.73 $\pm$ 11.80      | 67.86 $\pm$ 5.18        |
| DMSO 0.01%       | 32.68 $\pm$ 22.61      | 35.51 $\pm$ 26.12       |
| TCC 5 $\mu$ g/L  | 36.38 $\pm$ 1.48       | 81.60 $\pm$ 32.92       |
| TCC 50 $\mu$ g/L | 35.76 $\pm$ 15.05      | 61.37 $\pm$ 19.37       |

**Table S2.** Oxysterol mean values  $\pm$  SD in zebrafish embryos treated with PP and TCC at 8 hpf. The oxysterols concentrations are reported as ng/mL.

|                  | 22-OH            | 25-OH            | 24-OH             | 27-OH             | 7a-OH            | 7b-OH            |
|------------------|------------------|------------------|-------------------|-------------------|------------------|------------------|
| DMSO 0.1%        | 10.77 $\pm$ 6.22 | 12.11 $\pm$ 11.2 | 5.18 $\pm$ 2.55   | 4.17 $\pm$ 2.41   | 13.04 $\pm$ 9.42 | 8.99 $\pm$ 3.11  |
| PP 10 $\mu$ g/L  | <LOQ             | 1.03 $\pm$ 0.59  | <LOQ              | 23.72 $\pm$ 15.94 | 9.31 $\pm$ 8.25  | 10.54 $\pm$ 5.92 |
| PP 1 mg/L        | <LOQ             | <LOQ             | 5.33 $\pm$ 1.28   | 6.91 $\pm$ 5.93   | 6.25 $\pm$ 3.21  | 4.26 $\pm$ 3.95  |
| DMSO 0.01%       | <LOQ             | 11.54 $\pm$ 6.66 | 8.89 $\pm$ 4.08   | 15.31 $\pm$ 13.25 | 4.53 $\pm$ 2.51  | 8.61 $\pm$ 3.57  |
| TCC 5 $\mu$ g/L  | <LOQ             | <LOQ             | 4.45 $\pm$ 1.45   | 14.54 $\pm$ 4.76  | 6.78 $\pm$ 1.05  | 10.63 $\pm$ 2.88 |
| TCC 50 $\mu$ g/L | 3.86 $\pm$ 2.74  | 2.39 $\pm$ 1.69  | 28.36 $\pm$ 20.05 | 8.32 $\pm$ 2.94   | <LOQ             | 8.21 $\pm$ 1.01  |

**Table S3.** Oxysterol mean values  $\pm$  SD in zebrafish embryos treated with PP and TCC at 24 hpf. The oxysterols concentrations are reported as ng/mL.

|                  | 22-OH            | 25-OH            | 24-OH            | 27-OH             | 7a-OH            | 7b-OH            |
|------------------|------------------|------------------|------------------|-------------------|------------------|------------------|
| DMSO 0.1%        | 14.80 $\pm$ 8.54 | 13.36 $\pm$ 7.71 | <LOQ             | 50.57 $\pm$ 30.07 | 6.87 $\pm$ 2.15  | 14.09 $\pm$ 4.96 |
| PP 10 $\mu$ g/L  | <LOQ             | <LOQ             | 12.18 $\pm$ 9.1  | 28.43 $\pm$ 0.4   | 16.39 $\pm$ 8.27 | 21.86 $\pm$ 8.99 |
| PP 1 mg/L        | <LOQ             | <LOQ             | 9.88 $\pm$ 5     | 31.16 $\pm$ 0.16  | 10.31 $\pm$ 0.6  | 16.52 $\pm$ 0.63 |
| DMSO 0.01%       | <LOQ             | <LOQ             | <LOQ             | 27.34 $\pm$ 17.93 | 6.84 $\pm$ 3.51  | 10.57 $\pm$ 9.09 |
| TCC 5 $\mu$ g/L  | <LOQ             | <LOQ             | 14.13 $\pm$ 6.64 | 47.38 $\pm$ 24.66 | 13.41 $\pm$ 7.06 | 15.76 $\pm$ 7.83 |
| TCC 50 $\mu$ g/L | <LOQ             | <LOQ             | 5.62 $\pm$ 3.97  | 42.63 $\pm$ 14.57 | 4.02 $\pm$ 1.02  | 11.91 $\pm$ 0.19 |
